# Supplementary material for: Cell Cycle Constraints and Environmental Control of Local DNA Hypomethylation in α-Proteobacteria
Source: PLoS Genet. 2016 Dec 20;12(12):e1006499. doi: 10.1371/journal.pgen.1006499 (PMC5172544; doi:10.1371/journal.pgen.1006499)
Supplement: S3 Table — (XLSX) [file pgen.1006499.s008.xlsx]

## Sheet: Cc_WT
start	strand	motif	QV	coverage	IPD ratio
181215	+	GANTC	10	33	1.666		P169
181217	-	GANTC	14	42	1.573
1187860	+	GANTC	11	46	1.497		CCNA_01083
1187862	-	GANTC	11	47	1.291
1188431	+	GANTC	15	21	2.246		CCNA_01083
1188433	-	GANTC	18	25	2.449
1927485	+	GANTC	3	63	1.003
1927487	-	GANTC	1	60	0.787
3056349	+	GANTC	15	36	1.473		P2901
3056351	-	GANTC	17	34	1.568
3415859	+	GANTC	19	37	2.041		P3248
3415861	-	GANTC	18	43	1.801

## Sheet: Cc_mucR1mucR2
start	strand	motif	QV	coverage	IPD ratio
738031	+	GANTC	6	65	1.135
738033	-	GANTC	7	71	1.121
1014421	+	GANTC	19	51	1.718
1014423	-	GANTC	25	57	2.154
1081324	+	GANTC	21	11	7.369
1081326	-	GANTC	26	16	4.207
1375838	+	GANTC	25	60	1.986		P1248
1375840	-	GANTC	7	55	1.166
1927485	+	GANTC	2	40	0.953
1927487	-	GANTC	5	36	1.194
2056538	+	GANTC	24	31	5.879
2056540	-	GANTC	13	30	1.925
2321619	+	GANTC	15	44	1.595
2321621	-	GANTC	19	47	1.7
2509257	+	GANTC	5	44	1.15
2509259	-	GANTC	29	49	2.432
2833062	+	GANTC	28	18	6.733
2833064	-	GANTC	23	17	3.831
3592546	+	GANTC	6	45	1.147		P3426
3592548	-	GANTC	19	46	1.613
3781337	+	GANTC	15	37	1.792
3781339	-	GANTC	4	35	1.052

## Sheet: Rm2011_WT
seqid	start	strand	motif	QV	coverage	IPD ratio
gi|459642631|gb|CP004138.1|_Sinorhizobium_meliloti_2011_plasmid_pSymA,_complete_sequence	314244	+	GANTC	17	88	1.495
gi|459642631|gb|CP004138.1|_Sinorhizobium_meliloti_2011_plasmid_pSymA,_complete_sequence	314246	-	GANTC	11	65	1.405
gi|459642631|gb|CP004138.1|_Sinorhizobium_meliloti_2011_plasmid_pSymA,_complete_sequence	410705	+	GANTC	14	33	1.82
gi|459642631|gb|CP004138.1|_Sinorhizobium_meliloti_2011_plasmid_pSymA,_complete_sequence	410707	-	GANTC	3	31	0.993
gi|459642631|gb|CP004138.1|_Sinorhizobium_meliloti_2011_plasmid_pSymA,_complete_sequence	415299	+	GANTC	16	44	1.576
gi|459642631|gb|CP004138.1|_Sinorhizobium_meliloti_2011_plasmid_pSymA,_complete_sequence	415301	-	GANTC	13	36	1.635
gi|459642631|gb|CP004138.1|_Sinorhizobium_meliloti_2011_plasmid_pSymA,_complete_sequence	553192	+	GANTC	13	26	2.1
gi|459642631|gb|CP004138.1|_Sinorhizobium_meliloti_2011_plasmid_pSymA,_complete_sequence	553194	-	GANTC	19	26	1.992
gi|459642631|gb|CP004138.1|_Sinorhizobium_meliloti_2011_plasmid_pSymA,_complete_sequence	668708	+	GANTC	18	34	2.103
gi|459642631|gb|CP004138.1|_Sinorhizobium_meliloti_2011_plasmid_pSymA,_complete_sequence	668710	-	GANTC	6	32	1.195
gi|459642631|gb|CP004138.1|_Sinorhizobium_meliloti_2011_plasmid_pSymA,_complete_sequence	899324	+	GANTC	18	26	2.383
gi|459642631|gb|CP004138.1|_Sinorhizobium_meliloti_2011_plasmid_pSymA,_complete_sequence	899326	-	GANTC	11	20	2.306
gi|459642631|gb|CP004138.1|_Sinorhizobium_meliloti_2011_plasmid_pSymA,_complete_sequence	909068	+	GANTC	10	28	1.448		a1635
gi|459642631|gb|CP004138.1|_Sinorhizobium_meliloti_2011_plasmid_pSymA,_complete_sequence	909070	-	GANTC	3	22	0.982
gi|459642631|gb|CP004138.1|_Sinorhizobium_meliloti_2011_plasmid_pSymA,_complete_sequence	1090391	+	GANTC	11	28	1.395
gi|459642631|gb|CP004138.1|_Sinorhizobium_meliloti_2011_plasmid_pSymA,_complete_sequence	1090393	-	GANTC	13	20	1.457
gi|459642631|gb|CP004138.1|_Sinorhizobium_meliloti_2011_plasmid_pSymA,_complete_sequence	1257682	+	GANTC	3	29	1.022		a2245
gi|459642631|gb|CP004138.1|_Sinorhizobium_meliloti_2011_plasmid_pSymA,_complete_sequence	1257684	-	GANTC	8	27	1.357
gi|459642631|gb|CP004138.1|_Sinorhizobium_meliloti_2011_plasmid_pSymA,_complete_sequence	1273973	+	GANTC	10	30	1.339
gi|459642631|gb|CP004138.1|_Sinorhizobium_meliloti_2011_plasmid_pSymA,_complete_sequence	1273975	-	GANTC	14	27	1.44
gi|459643953|gb|CP004139.1|_Sinorhizobium_meliloti_2011_plasmid_pSymB,_complete_sequence	25061	+	GANTC	1	21	0.813
gi|459643953|gb|CP004139.1|_Sinorhizobium_meliloti_2011_plasmid_pSymB,_complete_sequence	25063	-	GANTC	10	21	1.611
gi|459643953|gb|CP004139.1|_Sinorhizobium_meliloti_2011_plasmid_pSymB,_complete_sequence	56468	+	GANTC	17	29	2.447
gi|459643953|gb|CP004139.1|_Sinorhizobium_meliloti_2011_plasmid_pSymB,_complete_sequence	56470	-	GANTC	17	36	1.662
gi|459643953|gb|CP004139.1|_Sinorhizobium_meliloti_2011_plasmid_pSymB,_complete_sequence	218477	+	GANTC	16	39	1.668
gi|459643953|gb|CP004139.1|_Sinorhizobium_meliloti_2011_plasmid_pSymB,_complete_sequence	218479	-	GANTC	11	32	1.478
gi|459643953|gb|CP004139.1|_Sinorhizobium_meliloti_2011_plasmid_pSymB,_complete_sequence	355514	+	GANTC	2	24	0.929
gi|459643953|gb|CP004139.1|_Sinorhizobium_meliloti_2011_plasmid_pSymB,_complete_sequence	355516	-	GANTC	2	23	0.954
gi|459643953|gb|CP004139.1|_Sinorhizobium_meliloti_2011_plasmid_pSymB,_complete_sequence	634139	+	GANTC	3	20	1.02
gi|459643953|gb|CP004139.1|_Sinorhizobium_meliloti_2011_plasmid_pSymB,_complete_sequence	634141	-	GANTC	9	23	1.485
gi|459643953|gb|CP004139.1|_Sinorhizobium_meliloti_2011_plasmid_pSymB,_complete_sequence	774365	+	GANTC	11	28	1.43
gi|459643953|gb|CP004139.1|_Sinorhizobium_meliloti_2011_plasmid_pSymB,_complete_sequence	774367	-	GANTC	18	30	2.586
gi|459643953|gb|CP004139.1|_Sinorhizobium_meliloti_2011_plasmid_pSymB,_complete_sequence	985948	+	GANTC	9	29	1.376
gi|459643953|gb|CP004139.1|_Sinorhizobium_meliloti_2011_plasmid_pSymB,_complete_sequence	985950	-	GANTC	18	25	2.088
gi|459643953|gb|CP004139.1|_Sinorhizobium_meliloti_2011_plasmid_pSymB,_complete_sequence	1060497	+	GANTC	16	33	1.753
gi|459643953|gb|CP004139.1|_Sinorhizobium_meliloti_2011_plasmid_pSymB,_complete_sequence	1060499	-	GANTC	15	32	1.871
gi|459645537|gb|CP004140.1|_Sinorhizobium_meliloti_2011,_complete_genome	57775	+	GANTC	9	32	1.335
gi|459645537|gb|CP004140.1|_Sinorhizobium_meliloti_2011,_complete_genome	57777	-	GANTC	13	34	1.555
gi|459645537|gb|CP004140.1|_Sinorhizobium_meliloti_2011,_complete_genome	334572	+	GANTC	12	31	1.356
gi|459645537|gb|CP004140.1|_Sinorhizobium_meliloti_2011,_complete_genome	334574	-	GANTC	6	32	1.213
gi|459645537|gb|CP004140.1|_Sinorhizobium_meliloti_2011,_complete_genome	445241	+	GANTC	9	34	1.302
gi|459645537|gb|CP004140.1|_Sinorhizobium_meliloti_2011,_complete_genome	445243	-	GANTC	17	30	1.537
gi|459645537|gb|CP004140.1|_Sinorhizobium_meliloti_2011,_complete_genome	603473	+	GANTC	13	33	1.412
gi|459645537|gb|CP004140.1|_Sinorhizobium_meliloti_2011,_complete_genome	603475	-	GANTC	10	34	1.713
gi|459645537|gb|CP004140.1|_Sinorhizobium_meliloti_2011,_complete_genome	892252	+	GANTC	1	163	0.901
gi|459645537|gb|CP004140.1|_Sinorhizobium_meliloti_2011,_complete_genome	892254	-	GANTC	12	171	1.255
gi|459645537|gb|CP004140.1|_Sinorhizobium_meliloti_2011,_complete_genome	1275258	+	GANTC	11	24	1.588
gi|459645537|gb|CP004140.1|_Sinorhizobium_meliloti_2011,_complete_genome	1275260	-	GANTC	10	27	1.504
gi|459645537|gb|CP004140.1|_Sinorhizobium_meliloti_2011,_complete_genome	1600317	+	GANTC	7	27	1.323
gi|459645537|gb|CP004140.1|_Sinorhizobium_meliloti_2011,_complete_genome	1600319	-	GANTC	6	28	1.127
gi|459645537|gb|CP004140.1|_Sinorhizobium_meliloti_2011,_complete_genome	2490295	+	GANTC	7	29	1.275
gi|459645537|gb|CP004140.1|_Sinorhizobium_meliloti_2011,_complete_genome	2490297	-	GANTC	12	31	1.597
gi|459645537|gb|CP004140.1|_Sinorhizobium_meliloti_2011,_complete_genome	2493007	+	GANTC	3	20	1.015
gi|459645537|gb|CP004140.1|_Sinorhizobium_meliloti_2011,_complete_genome	2493009	-	GANTC	11	25	1.402
gi|459645537|gb|CP004140.1|_Sinorhizobium_meliloti_2011,_complete_genome	2518210	+	GANTC	13	48	1.595
gi|459645537|gb|CP004140.1|_Sinorhizobium_meliloti_2011,_complete_genome	2518212	-	GANTC	7	50	1.204
gi|459645537|gb|CP004140.1|_Sinorhizobium_meliloti_2011,_complete_genome	3170429	+	GANTC	9	22	1.531
gi|459645537|gb|CP004140.1|_Sinorhizobium_meliloti_2011,_complete_genome	3170431	-	GANTC	13	25	1.85

## Sheet: Rm101_mucR
seqid	start	strand	motif	QV	coverage	IPD ratio
gi|459642631|gb|CP004138.1|_Sinorhizobium_meliloti_2011_plasmid_pSymA,_complete_sequence	314244	+	GANTC	2	65	0.945
gi|459642631|gb|CP004138.1|_Sinorhizobium_meliloti_2011_plasmid_pSymA,_complete_sequence	314246	-	GANTC	2	65	0.935
gi|459642631|gb|CP004138.1|_Sinorhizobium_meliloti_2011_plasmid_pSymA,_complete_sequence	410705	+	GANTC	17	27	1.985
gi|459642631|gb|CP004138.1|_Sinorhizobium_meliloti_2011_plasmid_pSymA,_complete_sequence	410707	-	GANTC	2	29	0.906
gi|459642631|gb|CP004138.1|_Sinorhizobium_meliloti_2011_plasmid_pSymA,_complete_sequence	553192	+	GANTC	3	28	1.012
gi|459642631|gb|CP004138.1|_Sinorhizobium_meliloti_2011_plasmid_pSymA,_complete_sequence	553194	-	GANTC	18	34	1.944
gi|459642631|gb|CP004138.1|_Sinorhizobium_meliloti_2011_plasmid_pSymA,_complete_sequence	668708	+	GANTC	11	42	1.651
gi|459642631|gb|CP004138.1|_Sinorhizobium_meliloti_2011_plasmid_pSymA,_complete_sequence	668710	-	GANTC	18	40	2.031
gi|459643953|gb|CP004139.1|_Sinorhizobium_meliloti_2011_plasmid_pSymB,_complete_sequence	218477	+	GANTC	9	43	1.228
gi|459643953|gb|CP004139.1|_Sinorhizobium_meliloti_2011_plasmid_pSymB,_complete_sequence	218479	-	GANTC	2	40	0.965
gi|459643953|gb|CP004139.1|_Sinorhizobium_meliloti_2011_plasmid_pSymB,_complete_sequence	355514	+	GANTC	6	27	1.16
gi|459643953|gb|CP004139.1|_Sinorhizobium_meliloti_2011_plasmid_pSymB,_complete_sequence	355516	-	GANTC	4	23	1.074
gi|459643953|gb|CP004139.1|_Sinorhizobium_meliloti_2011_plasmid_pSymB,_complete_sequence	634139	+	GANTC	0	28	0.585
gi|459643953|gb|CP004139.1|_Sinorhizobium_meliloti_2011_plasmid_pSymB,_complete_sequence	634141	-	GANTC	4	32	1.047
gi|459643953|gb|CP004139.1|_Sinorhizobium_meliloti_2011_plasmid_pSymB,_complete_sequence	1060497	+	GANTC	7	22	1.366
gi|459643953|gb|CP004139.1|_Sinorhizobium_meliloti_2011_plasmid_pSymB,_complete_sequence	1060499	-	GANTC	19	21	2.944
gi|459645537|gb|CP004140.1|_Sinorhizobium_meliloti_2011,_complete_genome	301406	+	GANTC	12	20	2.431
gi|459645537|gb|CP004140.1|_Sinorhizobium_meliloti_2011,_complete_genome	301408	-	GANTC	18	21	2.352
gi|459645537|gb|CP004140.1|_Sinorhizobium_meliloti_2011,_complete_genome	334572	+	GANTC	14	29	1.831
gi|459645537|gb|CP004140.1|_Sinorhizobium_meliloti_2011,_complete_genome	334574	-	GANTC	18	28	2.287
gi|459645537|gb|CP004140.1|_Sinorhizobium_meliloti_2011,_complete_genome	1600317	+	GANTC	4	37	1.05
gi|459645537|gb|CP004140.1|_Sinorhizobium_meliloti_2011,_complete_genome	1600319	-	GANTC	8	34	1.268
gi|459645537|gb|CP004140.1|_Sinorhizobium_meliloti_2011,_complete_genome	2165905	+	GANTC	15	30	1.671
gi|459645537|gb|CP004140.1|_Sinorhizobium_meliloti_2011,_complete_genome	2165907	-	GANTC	15	31	1.912
gi|459645537|gb|CP004140.1|_Sinorhizobium_meliloti_2011,_complete_genome	2490295	+	GANTC	17	37	1.809
gi|459645537|gb|CP004140.1|_Sinorhizobium_meliloti_2011,_complete_genome	2490297	-	GANTC	19	40	1.995
gi|459645537|gb|CP004140.1|_Sinorhizobium_meliloti_2011,_complete_genome	2491507	+	GANTC	6	40	1.144
gi|459645537|gb|CP004140.1|_Sinorhizobium_meliloti_2011,_complete_genome	2491509	-	GANTC	7	30	1.317
gi|459645537|gb|CP004140.1|_Sinorhizobium_meliloti_2011,_complete_genome	3372433	+	GANTC	16	24	2.241
gi|459645537|gb|CP004140.1|_Sinorhizobium_meliloti_2011,_complete_genome	3372435	-	GANTC	17	30	1.831
